# Supplementary material for: Pro-Vegetarian Food Patterns and Cancer Risk among Italians from the Moli-Sani Study Cohort
Source: MDPI journal article supplement (doi:10.3390/nu15183976), 2023-09-14
Supplement: s1 [file s1]

**Pro-vegetarian food patterns and cancer risk among Italians from the Moli-sani Study cohort**

Martínez CF et al.

**On-line Supplementary Material**

**Supplementary Figure S1.** Flowchart for selection of study participants from the Moli-sani Study, 2005-2010.

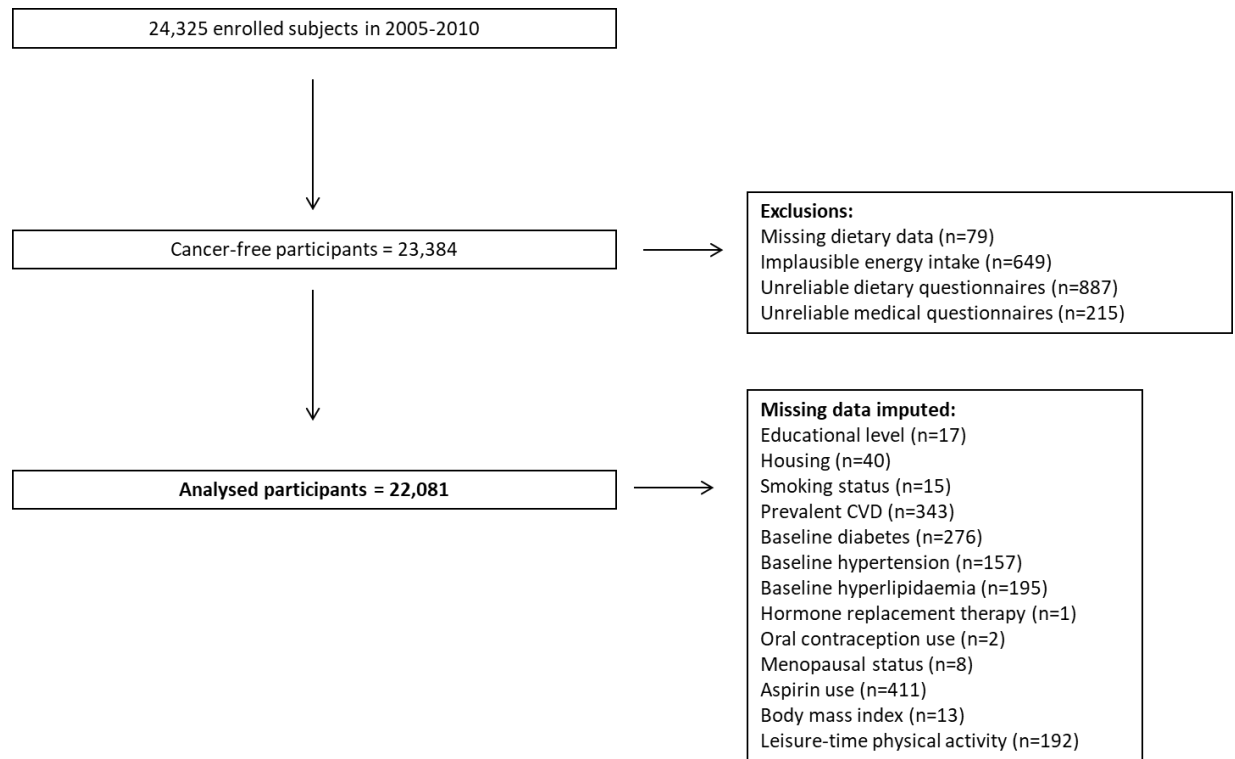

**Supplementary Table S1.** Scoring criteria for the pro-vegetarian (PVG) food patterns in the Moli-sani Study cohort, Italy 2005-2010.

| Component                              | Included foods                                                                                                                                                                                      | General PVG | Healthful PVG | Unhealthful PVG |
|----------------------------------------|-----------------------------------------------------------------------------------------------------------------------------------------------------------------------------------------------------|-------------|---------------|-----------------|
| <i>Plant food groups (n=12)</i>        |                                                                                                                                                                                                     |             |               |                 |
| Vegetables                             | Spinach, turnip greens, salad, green pepper, pumpkin, tomatoes, carrot, beet, broccoli, Brussel sprouts, cauliflower, cabbage, kale, mushrooms, garlic, onions, zucchini, artichoke, fennel, olives | Positive    | Positive      | Reverse         |
| Fruits                                 | Citrus, apple, pear, banana, kiwi, grape, peach, apricot, prune, strawberries, melon, fruit salad, figs, cherries, persimmon                                                                        | Positive    | Positive      | Reverse         |
| Legumes                                | Beans, chickpeas, lentils, peas, broad beans                                                                                                                                                        | Positive    | Positive      | Reverse         |
| Whole grain                            | Whole-grain bread                                                                                                                                                                                   | Positive    | Positive      | Reverse         |
| Refined grains                         | Crispbread/rusks, breakfast cereals, white bread, other bread, rice, pasta and other grains                                                                                                         | Positive    | Reverse       | Positive        |
| Potatoes                               | Potatoes                                                                                                                                                                                            | Positive    | Reverse       | Positive        |
| Nuts and dried fruit                   | Walnut, hazelnut, almond, peanut, dried fruit                                                                                                                                                       | Positive    | Positive      | Reverse         |
| Olive oil                              | Common olive oil                                                                                                                                                                                    | Positive    | Positive      | Reverse         |
| Tea and coffee                         | Tea, caffeinated coffee, decaffeinated coffee                                                                                                                                                       | Not scored  | Positive      | Reverse         |
| Fruit juices                           | Fruit juices                                                                                                                                                                                        | Not scored  | Reverse       | Positive        |
| Sugar-sweetened beverages              | Carbonated/soft/isotonic drinks, diluted syrups                                                                                                                                                     | Not scored  | Reverse       | Positive        |
| Sweets and desserts                    | Chocolate, nut spread, candies, cakes, pies, pastries, puddings (non-milk based), biscuits, dry cakes, honey, jam and sugar                                                                         | Not scored  | Reverse       | Positive        |
| <i>Animal food groups (n=5)</i>        |                                                                                                                                                                                                     |             |               |                 |
| Meat and meat products                 | Chicken or turkey, rabbit, beef, pork, lamb, veal, offal, ham, cured meats, salami, mortadella, sausage, hamburger                                                                                  | Reverse     | Reverse       | Reverse         |
| Animal fats for cooking or as a spread | Butter, another animal fat                                                                                                                                                                          | Reverse     | Reverse       | Reverse         |
| Eggs                                   | Eggs                                                                                                                                                                                                | Reverse     | Reverse       | Reverse         |
| Fish and other seafood                 | Hake, sole, sardines, trout, swordfish, shrimp, prawns, squid, cuttlefish, octopus, clams, stock fish, canned fish                                                                                  | Reverse     | Reverse       | Reverse         |
| Milk and dairy products                | Whole milk, partially skimmed or skimmed milk, plain yogurt, low-fat yogurt, fruit yogurt, hard cheese, soft cheese, ice cream                                                                      | Reverse     | Reverse       | Reverse         |

Positive indicates that higher consumption of this food group received higher scores. Reverse indicates that higher consumption of this food group received lower scores. In the general PVG food pattern, consumption of whole grains and refined grains was aggregated as the “grains” food group.

**Supplementary Table S2.** Associations of pro-vegetarian (PVG) Food Patterns with nutritional factors in cancer-free participants from the Moli-sani Study cohort (n=22,081)

| <i>Nutritional factors</i> | Change in nutritional factor   |       |         |                                |       |         |                                |       |         |
|----------------------------|--------------------------------|-------|---------|--------------------------------|-------|---------|--------------------------------|-------|---------|
|                            | General PVG                    |       |         | Healthful PVG                  |       |         | Unhealthful PVG                |       |         |
|                            | Regression coefficient $\beta$ | SE    | p-value | Regression coefficient $\beta$ | SE    | p-value | Regression coefficient $\beta$ | SE    | p-value |
| Vegetables                 | 6.18                           | 0.07  | <.0001  | 6.42                           | 0.07  | <.0001  | -5.40                          | 0.06  | <.0001  |
| Fruits                     | 10.49                          | 0.25  | <.0001  | 13.39                          | 0.22  | <.0001  | -9.53                          | 0.21  | <.0001  |
| Legumes                    | 0.75                           | 0.01  | <.0001  | 0.81                           | 0.01  | <.0001  | -0.69                          | 0.01  | <.0001  |
| Whole grains               | 0.27                           | 0.03  | <.0001  | 0.53                           | 0.02  | <.0001  | -0.43                          | 0.02  | <.0001  |
| Refined grains             | 1.89                           | 0.09  | <.0001  | -2.17                          | 0.08  | <.0001  | 4.63                           | 0.07  | <.0001  |
| Cereals                    | 2.32                           | 0.08  | <.0001  | -1.12                          | 0.07  | <.0001  | 4.06                           | 0.06  | <.0001  |
| Potatoes                   | 0.84                           | 0.02  | <.0001  | -0.57                          | 0.02  | <.0001  | 0.12                           | 0.02  | <.0001  |
| Nuts                       | 0.06                           | 0.00  | <.0001  | 0.06                           | 0.00  | <.0001  | -0.05                          | 0.00  | <.0001  |
| Olive oil                  | 0.71                           | 0.01  | <.0001  | 0.63                           | 0.01  | <.0001  | -0.60                          | 0.01  | <.0001  |
| Coffee/tea                 | -0.42                          | 0.09  | <.0001  | 2.32                           | 0.08  | <.0001  | -2.44                          | 0.07  | <.0001  |
| Fruit juice                | -0.07                          | 0.07  | 0.28    | -0.23                          | 0.06  | 0.0002  | 0.10                           | 0.06  | 0.08    |
| Sugary beverages           | -0.47                          | 0.08  | <.0001  | -0.67                          | 0.07  | <.0001  | 0.82                           | 0.06  | <.0001  |
| Sweets                     | -0.77                          | 0.05  | <.0001  | -1.00                          | 0.04  | <.0001  | 1.61                           | 0.04  | <.0001  |
| Meat and meat products     | -2.54                          | 0.04  | <.0001  | -1.96                          | 0.04  | <.0001  | -1.46                          | 0.04  | <.0001  |
| Animal fat                 | -0.11                          | 0.00  | <.0001  | -0.08                          | 0.00  | <.0001  | -0.06                          | 0.00  | <.0001  |
| Eggs                       | -0.44                          | 0.01  | <.0001  | -0.37                          | 0.01  | <.0001  | -0.35                          | 0.01  | <.0001  |
| Fish                       | -0.55                          | 0.03  | <.0001  | -0.24                          | 0.03  | <.0001  | -1.39                          | 0.03  | <.0001  |
| Dairy products             | -4.91                          | 0.13  | <.0001  | -1.52                          | 0.13  | <.0001  | -3.82                          | 0.11  | <.0001  |
| Energy intake (kcal/d)     | -8.78                          | 0.63  | <.0001  | 7.93                           | 0.59  | <.0001  | -3.47                          | 0.54  | <.0001  |
| Fibre                      | 0.47                           | 0.005 | <.0001  | 0.45                           | 0.005 | <.0001  | -0.26                          | 0.005 | <.0001  |
| Alcohol (g/d)              | -0.32                          | 0.02  | <.0001  | 0.11                           | 0.02  | <.0001  | 0.21                           | 0.02  | <.0001  |
| Carbohydrate (% TEI)       | 0.37                           | 0.01  | <.0001  | 0.04                           | 0.01  | <.0001  | 0.43                           | 0.01  | <.0001  |
| Protein (% TEI)            | -0.14                          | 0.002 | <.0001  | -0.10                          | 0.002 | <.0001  | -0.11                          | 0.002 | <.0001  |
| Fat (% TEI)                | -0.11                          | 0.01  | <.0001  | 0.02                           | 0.01  | <.0001  | -0.36                          | 0.005 | <.0001  |

SE=standard error; TEI=total energy intake. Change for a 1-unit increase in three food patterns. P values were obtained from linear regression models adjusted for sex, age, and energy intake.

**Supplementary Title for Figure S2.** Association between adherence to a) healthful pro-vegetarian food pattern; and b) unhealthy pro-vegetarian food pattern with cancer risk in participants from the Moli-sani study cohort (n = 22,081).

**Legend for Figure S2.** Cancer-free survival curves were obtained from the multivariable model adjusted for age, sex, energy intake, alcohol intake, residence, educational level, housing tenure, occupational class, smoking status, body mass index, leisure-time physical activity, history of CVD, diabetes, hypertension, hyperlipidaemia, aspirin use, oral contraception use, hormone replacement therapy, menopausal status, and family history of cancer. Cancer-free survival curves were generated using the first imputed dataset. The other imputed datasets were similar and thus omitted.

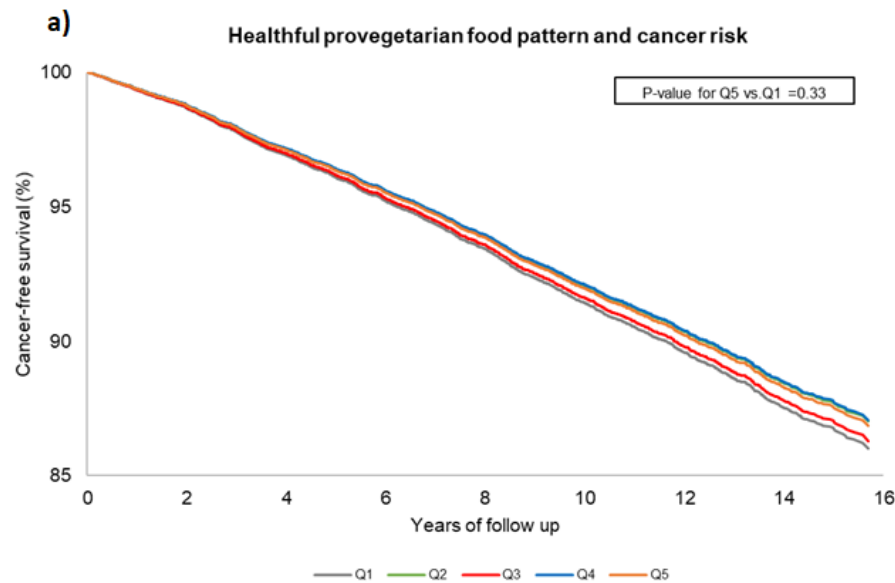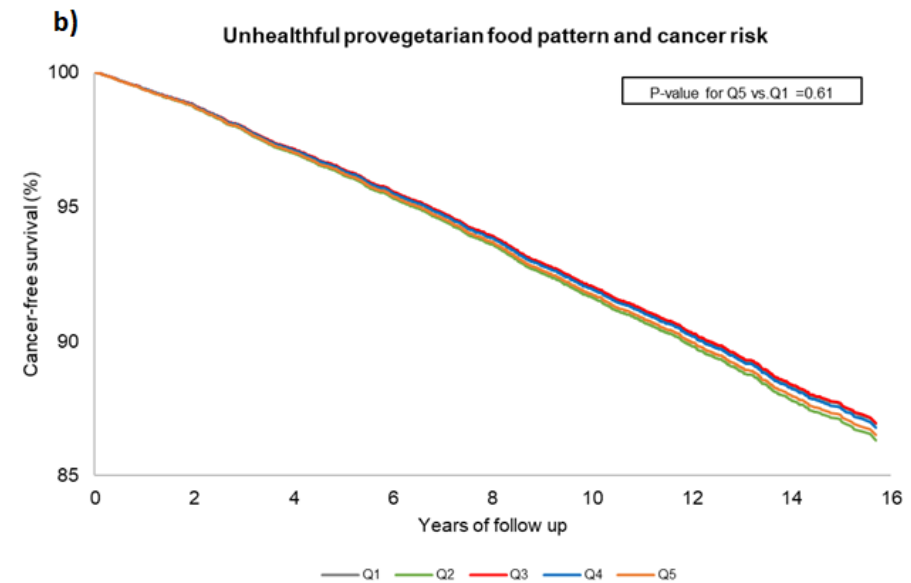

## Supplementary Appendix

The enrolment phase of the Moli-sani Study was conducted at the Research Laboratories of the Catholic University in Campobasso (Italy), the follow up of the Moli-sani cohort is being conducted at the Department of Epidemiology and Prevention of the IRCCS Neuromed, Pozzilli, Italy.

**Steering Committee:** Licia Iacoviello<sup>\*°</sup>(Chairperson), Giovanni de Gaetano\* and Maria Benedetta Donati\*.

**Scientific Secretariat:** Chiara Cerletti\*, Marialaura Bonaccio\*, Americo Bonanni\*, Simona Costanzo\*, Amalia De Curtis\*, Augusto Di Castelnuovo§, Alessandro Gialluisi<sup>\*°</sup>, Francesco Gianfagna<sup>°§</sup>, Mariarosaria Persichillo\*, Teresa Di Prospero\* (Secretary).

**Safety and Ethical Committee:** Jos Vermeylen (Catholic University, Leuven, Belgio) (Chairperson), Renzo Pegoraro (Pontificia Accademia per la Vita, Roma, Italy), Antonio Spagnolo (Catholic University, Roma, Italy).

**External Event Adjudicating Committee:** Deodato Assanelli (Brescia, Italy), Livia Rago (Campobasso, Italy).

**Baseline and Follow-up Data Management:** Simona Costanzo\* (Coordinator), Marco Olivieri (Campobasso, Italy), Teresa Panzera\*.

**Data Analysis:** Augusto Di Castelnuovo§ (Coordinator), Marialaura Bonaccio\*, Simona Costanzo\*, Simona Esposito\*, Alessandro Gialluisi<sup>\*°</sup>, Francesco Gianfagna<sup>°§</sup>, Sabatino Orlandi\*, Emilia Ruggiero\*, Alfonsina Tirozzi\*.

**Biobank, Molecular and Genetic Laboratory:** Amalia De Curtis\* (Coordinator), Sara Magnacca§, Fabrizia Noro\*, Alfonsina Tirozzi\*.

**Recruitment Staff:** Mariarosaria Persichillo\* (Coordinator), Francesca Bracone\*, Teresa Panzera\*.

**Communication and Press Office:** Americo Bonanni\*.

**Regional Institutions:** Direzione Generale per la Salute – Regione Molise; Azienda Sanitaria Regionale del Molise (ASReM, Italy); Agenzia Regionale per la Protezione Ambientale del Molise (ARPA Molise, Italy); Molise Dati Spa (Campobasso, Italy); Offices of vital statistics of the Molise region.

**Hospitals:** Presidi Ospedalieri ASReM: Ospedale A. Cardarelli – Campobasso, Ospedale F. Veneziale – Isernia, Ospedale San Timoteo – Termoli (CB), Ospedale Ss. Rosario – Venafrò (IS), Ospedale Vietri – Larino (CB), Ospedale San Francesco Caracciolo – Agnone (IS); Casa di Cura Villa Maria – Campobasso; Ospedale Gemelli Molise – Campobasso; IRCCS Neuromed – Pozzilli (IS).

<sup>\*</sup>Department of Epidemiology and Prevention, IRCCS Neuromed, Pozzilli, Italy

<sup>°</sup>Department of Medicine and Surgery, University of Insubria, Varese, Italy

<sup>§</sup>Mediterranea Cardiocentro, Napoli, Italy

Moli-sani Study Past Investigators are available at [https://www.moli-sani.org/?page\\_id=173](https://www.moli-sani.org/?page_id=173)
